# Supplementary material for: Chicken Cytochrome P450 1A5 Is the Key Enzyme for Metabolizing T-2 Toxin to 3′OH-T-2
Source: Int J Mol Sci. 2013 May 23;14(6):10809–18. doi: 10.3390/ijms140610809 (PMC3709703; doi:10.3390/ijms140610809)
Supplement: Supplementary file 1 [file ijms-14-10809-s001.pdf]

## Supplementary Information

**Figure S1.** 7-Ethoxyresorufin *O*-deethylase (EROD) assay of recombinant CYP1A5 and S9 prepared from HeLa-CYP1A4 and HeLa-CYP1A5. 100  $\mu$ M 7-ethoxyresorufin was incubated with 0.6 mg S9 prepared from HeLa-CYP1A4 and HeLa-CYP1A5, containing 10  $\mu$ M  $\alpha$ NF or not. 7-ethoxyresorufin was metabolized by S9 prepared from HeLa-CYP1A4 without  $\alpha$ NF (**A**), or with  $\alpha$ NF (**B**). 7-ethoxyresorufin was metabolized by S9 prepared from HeLa-CYP1A5 without  $\alpha$ NF (**C**), or with  $\alpha$ NF (**D**). 7-Ethoxyresorufin *O*-deethylase (EROD) assay was performed with recombinant CYP1A5 in a reconstituted system and containing 10  $\mu$ M  $\alpha$ NF or not. The oxidative products of 7-Ethoxyresorufin were present at around 2.5 minutes (**E**). The metabolite peak was depressed significantly by the addition of  $\alpha$ NF (**F**).

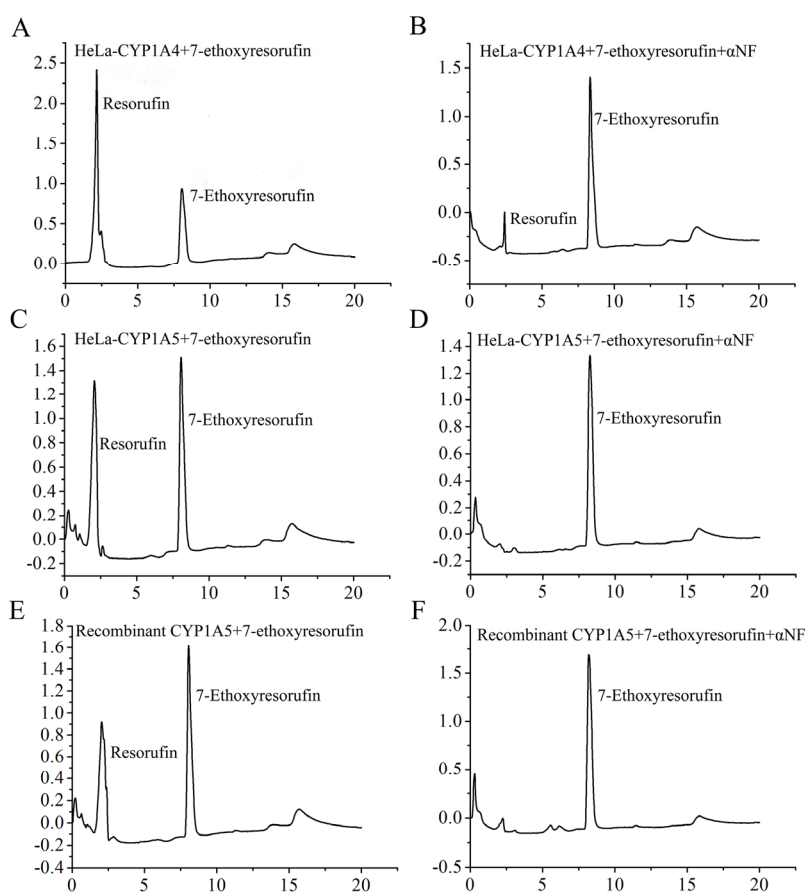

**Table S1.** Primers used for real-time PCR. Primers used to analyze mRNA level of chicken cytochrome P450s (including CYP1A4, CYP1A5, CYP2C18, CYP2C45, CYP2H1, CYP2D49, CYP3A37, and CYP3A80) after chicken embryos hepatocyte cells exposed to T-2 by real-time PCR.

| Chicken Cytochrome P450 | Primers for real-time PCR                                      |
|-------------------------|----------------------------------------------------------------|
| CYP3A80 XM_003210584    | Forward: CACCGTGACCCGGCGTACT<br>Reverse: TTCTGCGGATCACTGTGGG   |
| CYP2 H1 NM_001001616.1  | Forward: TGGGAGAGGAATACTGCCT<br>Reverse: TGGATTAAGAACTTCCCAGGG |
| CYP2C19 NM_001001757.1  | Forward: GTGGGAGAGGCAATCTGC<br>Reverse: TTGAAAGGTTTCTCGTGTGTG  |
| CYP1A5 NM_205146.2      | Forward: GGACCGTTGCGTGTAT<br>Reverse: CTCCCACTTGCCATGTTTT      |
| CYP1A4 NM_205147.1      | Forward: TCAATGCTCGTTTCAGTGCC<br>Reverse: AAGGCAGCGTACATCATGCA |
| CYP3A37 NM_001001751.2  | Forward: TAAGGCTCCGCTCACGTA<br>Reverse: GGTGCAGGGTGTAAAGGTG    |
| CYP2D49 NM_001195557    | Forward: GGCAAAGGGTAAGGAGGCT<br>Reverse: TGACGGCATTGGTGTAGGG   |
| B-ACTIN NM_205518.1     | Forward: GGCTGTGCTGTCCCTGTA<br>Reverse: CGGCTGTGGTGGTGAAG      |
| CYP2C45 NM_001001752.1  | Forward: GCTTGCCTGCTCTCCATC<br>Reverse: TCAAGGCTTCTTTCACCG     |
